# Supplementary material
Source: Springer Nature journal article supplement (https://www.springermedizin.de/resource/supplementary/12865_2009_301_MOESM11_ESM.pdf/9427706)

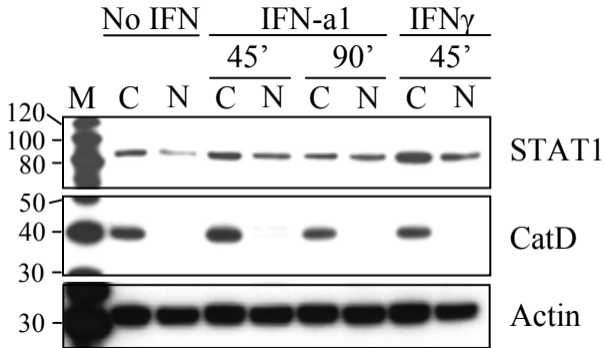

Supplement: MOESM11 [file 9427706]
